# Supplementary material
Source: Research Square preprint supplement (doi:10.21203/rs.3.rs-9149925/v1)
Supplement: Supplementary file 1 [file d792a4957de5eb0115da1f9b.docx]

**Prognostic Factors Analysis in Breast Cancer Patients with Brain Metastases: Identification of Key Determinants of Survival**

**Supplementary Material 1**

Supplementary Table 1. Results of univariate and multivariate analysis of survival related factors in 505 breast cancer patients with brain metastases.

| Variables | Univariate analysis |  | | | Multivariate analysis |
| --- | --- | --- | --- | --- | --- |
| *P* | HR (95%CI) |  | *P* | HR (95%CI) |
| Age |  |  |  |  |  |
| ＞45 |  |  |  |  |  |
| ≤45 | 0.879 | 1.02 (0.83 ~ 1.25) |  |  |  |
| Menopausal conditions |  |  |  |  |  |
| No |  |  |  |  |  |
| Yes | 0.356 | 1.11 (0.89 ~ 1.37) |  |  |  |
| Histological grade |  |  |  |  |  |
| 1 grade |  |  |  |  |  |
| 2 grade | 0.207 | 1.77 (0.73 ~ 4.31) |  |  |  |
| 3 grade | 0.780 | 1.04 (0.80 ~ 1.34) |  |  |  |
| unknow | 0.820 | 0.97 (0.72 ~ 1.30) |  |  |  |
| T stage |  |  |  |  |  |
| T1 |  |  |  |  |  |
| T2 | 0.974 | 1.01 (0.67 ~ 1.50) |  |  |  |
| T3 | 0.380 | 1.23 (0.78 ~ 1.94) |  |  |  |
| T4 | 0.891 | 0.97 (0.64 ~ 1.48) |  |  |  |
| Tx | 0.313 | 1.23 (0.82 ~ 1.83) |  |  |  |
| N stage |  |  |  |  |  |
| N0 |  |  |  |  |  |
| N1 | 0.647 | 1.08 (0.77 ~ 1.52) |  |  |  |
| N2 | 0.868 | 0.97 (0.67 ~ 1.41) |  |  |  |
| N3 | 0.218 | 1.25 (0.88 ~ 1.77) |  |  |  |
| Nx | 0.297 | 1.20 (0.85 ~ 1.69) |  |  |  |
| M stage |  |  |  |  |  |
| M 0 |  |  |  |  |  |
| M1 | 0.229 | 0.86 (0.66 ~ 1.10) |  |  |  |
| Estrogen receptor |  |  |  |  |  |
| Negative |  |  |  |  |  |
| Positive | 0.671 | 0.95 (0.76 ~ 1.19) |  |  |  |
| unknown | 0.705 | 0.93 (0.65 ~ 1.34) |  |  |  |
| HER2 |  |  |  |  |  |
| Negative |  |  |  |  |  |
| Positive | 0.102 | 0.81 (0.64 ~ 1.04) |  |  |  |
| unknown | 0.841 | 1.03 (0.80 ~ 1.33) |  |  |  |
| Molecular subtyping |  |  |  |  |  |
| Luminal A |  |  |  |  |  |
| Luminal B | 0.082 | 0.72 (0.50 ~ 1.04) |  | 0.078 | 0.71 (0.49 ~ 1.04) |
| HER2 overexpression type | 0.094 | 0.70 (0.46 ~ 1.06) |  | 0.140 | 0.71 (0.46 ~ 1.12) |
| Triple negative type | 0.742 | 0.93 (0.62 ~ 1.41) |  | 0.644 | 0.90 (0.59 ~ 1.39) |
| unknown | 0.173 | 0.76 (0.51 ~ 1.13) |  | 0.066 | 0.69 (0.46 ~ 1.02) |
| Neoadjuvant chemotherapy |  |  |  |  |  |
| No |  |  |  |  |  |
| Yes | 0.089 | 0.83 (0.68 ~ 1.03) |  | 0.584 | 0.94 (0.74 ~ 1.18) |
| Breast Surgery |  |  |  |  |  |
| No |  |  |  |  |  |
| Radical surgery | 0.666 | 1.06 (0.82 ~ 1.37) |  |  |  |
| Breast-conserving surgery | 0.609 | 0.88 (0.54 ~ 1.44) |  |  |  |
| unknown | 0.666 | 1.12 (0.68 ~ 1.85) |  |  |  |
| Adjuvant chemotherapy |  |  |  |  |  |
| No |  |  |  |  |  |
| Yes | 0.075 | 1.22 (0.98 ~ 1.51) |  | 0.068 | 1.24 (0.98 ~ 1.57) |
| Radiotherapy for the Breast |  |  |  |  |  |
| No |  |  |  |  |  |
| Yes | 0.276 | 0.89 (0.72 ~ 1.10) |  |  |  |
| Maintenance treatment |  |  |  |  |  |
| No |  |  |  |  |  |
| Endocrine Therapy | 0.746 | 1.04 (0.81 ~ 1.34) |  |  |  |
| Targeted Therapy | 0.237 | 0.79 (0.53 ~ 1.17) |  |  |  |
| Endocrine and targeted therapy | 0.136 | 0.68 (0.41 ~ 1.13) |  |  |  |
| Chemotherapy | 0.455 | 1.13 (0.82 ~ 1.56) |  |  |  |
| Size of brain metastases |  |  |  |  |  |
| ＞1cm |  |  |  |  |  |
| ≤1cm | 0.903 | 0.98 (0.76 ~ 1.28) |  |  |  |
| Number of brain metastases |  |  |  |  |  |
| ＞4 |  |  |  |  |  |
| ≤4 | 0.002 | 1.40 (1.13 ~ 1.74) |  | <.001 | 1.55 (1.23 ~ 1.95) |
| Leptomeningeal metastases |  |  |  |  |  |
| No |  |  |  |  |  |
| Yes | 0.009 | 1.54 (1.11 ~ 2.14) |  | 0.084 | 1.35 (0.96 ~ 1.89) |
| Location of brain metastases |  |  |  |  |  |
| Supratentorial transfer |  |  |  |  |  |
| Subtentorial transfer | 0.023 | 1.28 (1.03 ~ 1.58) |  | 0.166 | 1.17 (0.94 ~ 1.46) |
| unknown | 0.629 | 1.16 (0.64 ~ 2.08) |  | 0.167 | 1.54 (0.84 ~ 2.82) |
| Clinical symptoms |  |  |  |  |  |
| No |  |  |  |  |  |
| Yes | 0.919 | 1.01 (0.82 ~ 1.24) |  |  |  |
| Craniocerebral surgery |  |  |  |  |  |
| No |  |  |  |  |  |
| Yes | 0.032 | 0.65 (0.44 ~ 0.96) |  | 0.100 | 0.71 (0.48 ~ 1.07) |
| Endocrine Therapy |  |  |  |  |  |
| No |  |  |  |  |  |
| Yes | 0.064 | 0.79 (0.62 ~ 1.01) |  | 0.259 | 0.86 (0.66 ~ 1.12) |
| Chemotherapy |  |  |  |  |  |
| No |  |  |  |  |  |
| Yes | 0.045 | 0.80 (0.65 ~ 0.99) |  | 0.661 | 0.95 (0.74 ~ 1.21) |
| Targeted Therapy |  |  |  |  |  |
| No |  |  |  |  |  |
| Yes | 0.085 | 0.80 (0.63 ~ 1.03) |  | 0.904 | 1.02 (0.75 ~ 1.39) |
| Craniocerebral radiotherapy |  |  |  |  |  |
| No |  |  |  |  |  |
| Yes | <.001 | 0.52 (0.42 ~ 0.64) |  | <.001 | 0.47 (0.38 ~ 0.60) |

Supplementary Table2. Univariate and Multivariate Analysis of Intracranial PFS in 293 BCBM Patients Treated with RT. HER2: Human Epidermal Growth Factor Receptor 2; SRS: Stereotactic Radiosurgery; WBRT: Whole Brain Radiation Therapy

| Variables | Univariate analysis | |  | | | | Multivariate analysis |
| --- | --- | --- | --- | --- | --- | --- | --- |
| *P* | HR (95%CI) | |  | *P* | HR (95%CI) | |
| Age |  |  | |  |  |  | |
| ＞45 |  | 1.00 (Reference) | |  |  |  | |
| ≤ 45 | 0.311 | 0.85 (0.63 ~ 1.16) | |  |  |  | |
| Pathological pattern |  |  | |  |  |  | |
| Invasive carcinoma |  | 1.00 (Reference) | |  |  |  | |
| Other | 0.343 | 1.35 (0.73 ~ 2.51) | |  |  |  | |
| Estrogen receptor |  |  | |  |  |  | |
| Unknow |  | 1.00 (Reference) | |  |  |  | |
| Positive | 0.771 | 1.12 (0.52 ~ 2.43) | |  |  |  | |
| Negative | 0.704 | 1.16 (0.53 ~ 2.53) | |  |  |  | |
| HER2 |  |  | |  |  |  | |
| Unknow |  | 1.00 (Reference) | |  |  |  | |
| Positive | 0.577 | 1.14 (0.72 ~ 1.79) | |  |  |  | |
| Negative | 0.120 | 1.43 (0.91 ~ 2.24) | |  |  |  | |
| Ki67 |  |  | |  |  |  | |
| ＜14% |  | 1.00 (Reference) | |  |  |  | |
| ≥14% | 0.903 | 1.03 (0.69 ~ 1.53) | |  |  |  | |
| Unknow | 0.613 | 0.85 (0.46 ~ 1.57) | |  |  |  | |
| Size of brain metastases |  |  | |  |  |  | |
| ＞1cm |  | 1.00 (Reference) | |  |  |  | |
| ≤1cm | 0.853 | 0.96 (0.66 ~ 1.42) | |  |  |  | |
| Unknow | 0.921 | 1.04 (0.48 ~ 2.26) | |  |  |  | |
| Number of brain metastases |  |  | |  |  |  | |
| ＞4 |  | 1.00 (Reference) | |  |  |  | |
| ≤4 | 0.551 | 1.12 (0.77 ~ 1.63) | |  |  |  | |
| Unknow | 0.499 | 1.18 (0.73 ~ 1.92) | |  |  |  | |
| Leptomeningeal metastases |  |  | |  |  |  | |
| No |  | 1.00 (Reference) | |  |  | 1.00 (Reference) | |
| Yes | <.001 | 3.43 (1.94 ~ 6.06) | |  | <.001 | 3.07 (1.73 ~ 5.45) | |
| Location of brain metastases |  |  | |  |  |  | |
| Unknow |  | 1.00 (Reference) | |  |  |  | |
| Supratentorial transfer | 0.658 | 0.86 (0.44 ~ 1.67) | |  |  |  | |
| Subtentorial transfer | 0.701 | 0.88 (0.45 ~ 1.70) | |  |  |  | |
| Clinical symptoms |  |  | |  |  |  | |
| No |  | 1.00 (Reference) | |  |  |  | |
| Yes | 0.291 | 0.85 (0.62 ~ 1.15) | |  |  |  | |
| Craniocerebral surgery |  |  | |  |  |  | |
| No |  | 1.00 (Reference) | |  |  | 1.00 (Reference) | |
| Yes | 0.081 | 0.55 (0.28 ~ 1.08) | |  | 0.077 | 0.54 (0.27 ~ 1.07) | |
| Endocrine Therapy |  |  | |  |  |  | |
| No |  | 1.00 (Reference) | |  |  | 1.00 (Reference) | |
| Yes | 0.094 | 0.73 (0.51 ~ 1.05) | |  | 0.079 | 0.72 (0.50 ~ 1.04) | |
| Chemotherapy |  |  | |  |  |  | |
| No |  | 1.00 (Reference) | |  |  | 1.00 (Reference) | |
| Yes | 0.063 | 0.74 (0.54 ~ 1.02) | |  | 0.070 | 0.75 (0.54 ~ 1.02) | |
| Targeted Therapy |  |  | |  |  |  | |
| No |  | 1.00 (Reference) | |  |  |  | |
| Yes | 0.978 | 1.01 (0.70 ~ 1.45) | |  |  |  | |
| Methods of radiotherapy |  |  | |  |  |  | |
| SRS |  | 1.00 (Reference) | |  |  |  | |
| WBRT | 0.744 | 1.06 (0.76 ~ 1.46) | |  |  |  | |
| Concomitant medications for radiotherapy |  |  | |  |  |  | |
| No |  | 1.00 (Reference) | |  |  |  | |
| Yes | 0.339 | 0.86 (0.63 ~ 1.17) | |  |  |  | |
| Extracranial metastasis |  |  | |  |  |  | |
| No |  | 1.00 (Reference) | |  |  |  | |
| Yes | 0.154 | 1.31 (0.90 ~ 1.90) | |  |  |  | |

（A）


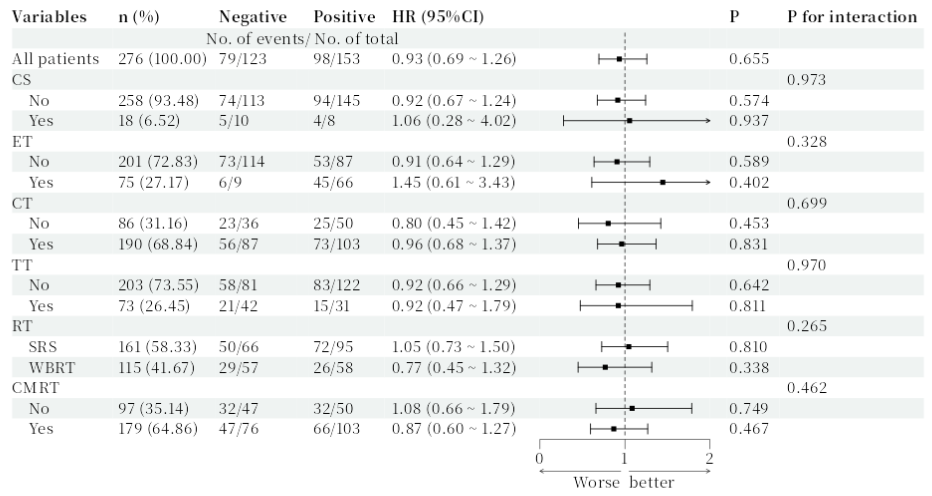


（B）


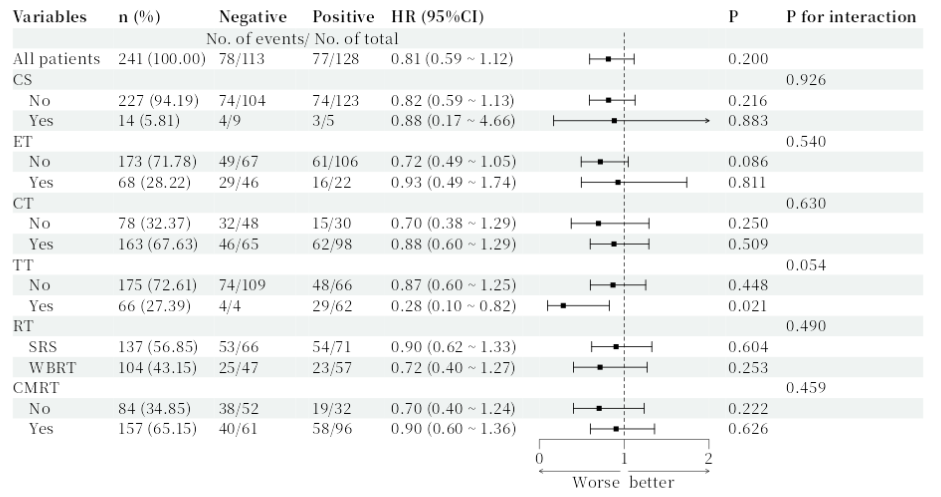


Supplementary Figure 1. Forest Plot of Subgroup Analysis for BCBM Patients Treated with RT. (A) Association between different treatment strategies after BM and RT-OS, stratified by ER expression status. (B) Association between different treatment strategies after BM and RT-OS, stratified by HER2 expression status. CS: Craniocerebral surgery; ET: Endocrine Therapy; CT: Chemotherapy; TT: Targeted Therapy; RT: Radiation therapy; CMRT: Concomitant medications for radiotherapy.


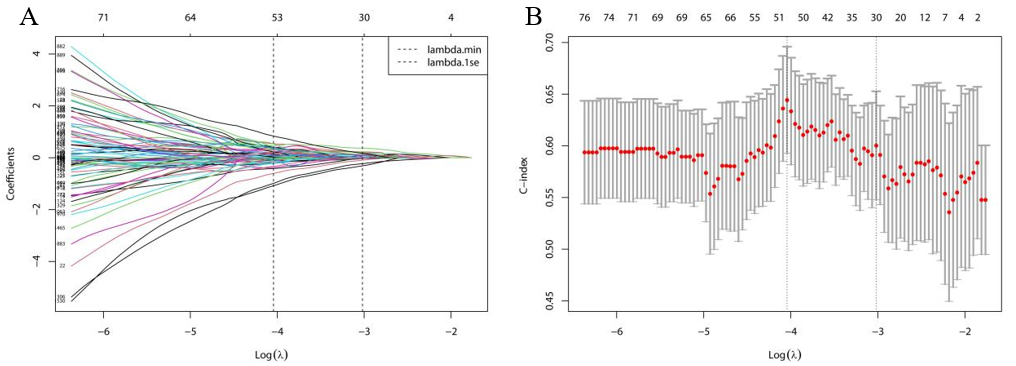


Supplementary Figure 2. Feature Selection Using LASSO-Cox Regression for Survival-Associated Predictors. (A) Trajectory of LASSO regression coefficients across different values of log(λ). (B) Relationship between log(λ) and the corresponding model deviance (error).

**Supplementary Material 2**

Predictive model related code

library(Matrix)

library(glmnet) # Core package for LASSO regression

library(survival) # Survival analysis package

install.packages("survminer")

library(ggpubr)

library(survminer) # Survival analysis visualization

library(ggplot2)

surv_data <- X149AA ### Imported Excel name

# Data Preprocessing

y <- Surv(surv_data$OS, surv_data$live) # Create survival object

x <- as.matrix(surv_data[, 3:ncol(surv_data)]) # Predictor variable matrix

# Check and handle missing values (adjust based on actual situation)

if(sum(is.na(x)) > 0) {

x <- na.omit(x) # Simply delete rows with missing values (or use imputation)

y <- y[rownames(x), ]

warning("Deleted samples containing missing values")}

# Standardize predictor variables (LASSO requires standardization)

x_scaled <- scale(x) # Mean = 0, Standard deviation = 1

#### LASSO Cox Regression

# Set up cross-validation

install.packages("doParallel")

library(foreach)

library(iterators)

library(parallel)

library(doParallel)

cv_fit <- cv.glmnet(

x = x_scaled,

y = y,

family = "cox", # Cox proportional hazards model

type.measure = "C", # Evaluate model using C-index

alpha = 1, # 1 = LASSO (0 = Ridge regression)

nfolds = 10, # 10-fold cross-validation

parallel = TRUE # Enable parallel processing if doParallel is installed

)

# Visualize cross-validation results

plot(cv_fit) # Show C-index and error at different lambda values

title("LASSO Cox Regression Cross-Validation Results", line = 2.5)

# Select optimal lambda values

lambda_min <- cv_fit$lambda.min # Lambda giving best C-index

lambda_1se <- cv_fit$lambda.1se # Most simplified model within 1 standard error

cat("Optimal lambda (min):", lambda_min, "\n")

cat("Simplified model lambda (1se):", lambda_1se, "\n")

# Extract final model

## Use lambda.min (prioritizes prediction accuracy) or lambda.1se (prioritizes simplicity)

final_model <- glmnet(

x = x_scaled,

y = y,

family = "cox",

alpha = 1)

# Get non-zero coefficient features

coef_min <- coef(final_model, s = lambda_min)

coef_1se <- coef(final_model, s = lambda_1se)

selected_min <- which(as.vector(coef_min) != 0)

selected_1se <- which(as.vector(coef_1se) != 0)

cat("\nNumber of features selected using lambda.min:", length(selected_min), "\n")

cat("Feature names:", colnames(x)[selected_min], "\n")

cat("\nNumber of features selected using lambda.1se:", length(selected_1se), "\n")

cat("Feature names:", colnames(x)[selected_1se], "\n")

# Visualize coefficient path

plot(final_model, xvar = "lambda", label = TRUE)

abline(v = log(c(lambda_min, lambda_1se)), lty = 2)

title("LASSO Coefficient Path Plot", line = 2.5)

legend("topright", legend = c("lambda.min", "lambda.1se"), lty = 2, col = 1)

# Model Evaluation

# Calculate predicted risk scores

risk_scores <- predict(final_model, newx = x_scaled, s = lambda_1se, type = "response")

# Save important results

# Output selected features and their coefficients

final_coef <- coef(final_model, s = lambda_1se)

selected_features <- final_coef[which(final_coef != 0), ]

cat("\nFinal model features and coefficients:\n")

print(selected_features)

### Multivariate COX Regression Analysis

install.packages("survival")

library(survival)

model <- coxph(Surv(OS, live) ~ ART+Size+Location+CT+KPS+YXLLHWFK+YXLLHWFmedian+

YXLHLWGLALGLE+YXLHLWNS+YXHLLWFmedian+YXHLLWGDV+YXHLHWFmean+

YXHLHWGLRLGLE+YXHHLWFmean+YXHHLWGSAE+YXHHHWGZE+JLOF10P+JLOGLGLE+

JLLLHWGSZNUN+JLLHLWFSn+JLLHHWGSE+JLLHHWGSAE+JLHLLWFSn+JLHLLWGMCC+

JLHLHWGDeE+JLHHLWGLGLZE+JLHHLWGSZNUN+JLHHHWFSn+JLLLLWGCl+

JLLLLWGLGLZE ,data = surv_data)

summary(model)

## Dynamic Nomogram

library(Hmisc)

library(rms)

install.packages("regplot")

library(regplot)

f <- cph(Surv(OS_years, live) ~ Location+CT+KPS+YXLLHWFK+

YXLHLWGLALGLE+YXLHLWNS+JLLHHWGSAE+JLHHLWGLGLZE+JLLLLWGLGLZE, data = da, maxit=15, x=T, y=T, surv=T)

regplot(f, observation = Idw_exper[4,], # Specify a specific patient, 85 means selecting the 85th patient in the dataset

interval = "confidence", title = "Nomogram",

plots = c("violin", "boxes"), clickable = T,

failtime = c(3, 2, 1)) # Set follow-up times: 1 year, 2 years, 3 years

# Time-dependent ROC for Nomogram: 1-year, 2-year, 3-year ROC

install.packages("survivalROC")

library(survivalROC)

da1 <- data.frame(Idw_exper)

cutoff <- 3

newdata <- predict(f, type = "lp") # Calculate combined prediction probability

write.csv(newdata, file = "C:/Users/Administrator/Desktop/final_prediction_probability_lp.csv")

# Set prediction time points (Year 1, 2, 3)

times <- c(1, 2, 3)

# Calculate ROC curves for each time point

roc_data <- lapply(times, function(t) {

survivalROC(

Stime = Idw_exper$OS_years, # Survival time

status = Idw_exper$live, # Event status

marker = Idw_exper$x, # Prediction values

predict.time = t, # Prediction time point

method = "NNE", # Non-parametric kernel estimation method

span = 0.25 * nrow(Idw_exper)^(-0.20) # Smoothing parameter

)

})

# Set plot colors

colors <- c("#E41A1C", "#377EB8", "#4DAF4A")

# Plot combined ROC curves

plot(roc_data[[1]]$FP, roc_data[[1]]$TP,

type = "l", col = colors[1], lwd = 2,

xlim = c(0, 1), ylim = c(0, 1),

xlab = "1 - Specificity (False Positive Rate)",

ylab = "Sensitivity (True Positive Rate)",

main = "Time-Dependent ROC Curves for COX Model")

abline(0, 1, lty = 2, col = "gray") # Add reference line

# Add curves for other time points

for (i in 2:length(times)) {

lines(roc_data[[i]]$FP, roc_data[[i]]$TP,

col = colors[i], lwd = 2)

}

# Add legend and AUC values

legend_text <- paste0("Year ", times, " (AUC = ",

sapply(roc_data, function(x) round(x$AUC, 3)), ")")

legend("bottomright",

legend = legend_text,

col = colors,

lty = 1,

lwd = 2,

title = "Time Points",

bty = "n")

# Add grid lines

grid(col = "lightgray", lty = "dotted")

box()

################## Calculate various statistical metrics

roc <- survivalROC(

Stime = Idw_exper$OS_years, # Survival time

status = Idw_exper$live, # Event status

marker = Idw_exper$x, # Prediction values

predict.time = 3, # Prediction time point

method = "KM", # Kaplan-Meier method

)

#### Optimal threshold

youden_index <- roc$TP - roc$FP

best_idx <- which.max(youden_index)

best_threshold <- roc$cut.values[best_idx]

# Calculate confusion matrix

predicted_class <- ifelse(Idw_exper$x >= best_threshold, 1, 0)

actual_class <- ifelse(Idw_exper$OS_years <= 3 & Idw_exper$live == 1, 1, 0)

# Calculate metrics

TP <- sum(predicted_class == 1 & actual_class == 1)

TN <- sum(predicted_class == 0 & actual_class == 0)

FP <- sum(predicted_class == 1 & actual_class == 0)

FN <- sum(predicted_class == 0 & actual_class == 1)

sensitivity <- TP / (TP + FN)

specificity <- TN / (TN + FP)

accuracy <- (TP + TN) / (TP + TN + FP + FN)

# Output results

cat("Threshold =", best_threshold, "\n",

"Sensitivity =", round(sensitivity, 3), "\n",

"Specificity =", round(specificity, 3), "\n",

"Accuracy =", round(accuracy, 3))

# Nomogram Calibration Curve

da <- data.frame(Idw_exper)

dc <- datadist(da)

options(datadist = "dc")

ff0.5 <- cph(Surv(OS_days, live) ~ Location+CT+KPS+YXLLHWFK+

YXLHLWGLALGLE+YXLHLWNS+JLLHHWGSAE+JLHHLWGLGLZE+JLLLLWGLGLZE, data = da, x=T, y=T, surv=T, time.inc=360)

cal_0.5 <- calibrate(ff0.5, cmethod='KM', method='boot', u=360, m=40, B=1000)

par(mar=c(7,4,4,3), cex=1.0)

plot(cal_0.5, lwd=2, lty=1, errbar.col=c(rgb(0,118,192,maxColorValue=255)), xlab='Nomogram 1-year OS Calibration Curve', ylab='1-year OS', col=c(rgb(192,98,83,maxColorValue=255)),

xlim=c(0,1), ylim=c(0,1))

## DCA (Decision Curve Analysis)

library(dcurves)

library(foreign)

library(survival)

library(dplyr)

str(Idw_exper)

f1 <- coxph(Surv(OS, live) ~ Location+CT+KPS+YXLLHWFK+

YXLHLWGLALGLE+YXLHLWNS+JLLHHWGSAE+JLHHLWGLGLZE+JLLLLWGLGLZE, data = Idw_exper)

Idw_exper$pr_failure1 = c(1-(summary(survfit(f1, newdata=Idw_exper), times=36)$surv))

dca(Surv(OS, live) ~ pr_failure1, data = Idw_exper, time=36, thresholds=1:50/100) %>%

plot(smooth=T)
